# Supplementary material for: Comparison of suction techniques for EUS-guided tissue acquisition: Systematic review and network meta-analysis of randomized controlled trials
Source: PubMed Central journal article supplement — Endosc Int Open. 2023 Aug 1;11(8):E703–11. doi: 10.1055/a-2085-3674 (PMC10411163; doi:10.1055/a-2085-3674), 2023-08-01
Supplement: 10-1055-a-2085-3674_20892560.pdf.pdf [file 10-1055-a-2085-3674_20892560.pdf.pdf]

## Supplementary material

Supplementary Figure 1A: Traffic light plot for the risk of bias assessment for the included studies

|       |               | Risk of bias domains |    |    |    |    |         |
|-------|---------------|----------------------|----|----|----|----|---------|
|       |               | D1                   | D2 | D3 | D4 | D5 | Overall |
| Study | Attam 2015    | +                    | +  | +  | +  | +  | +       |
|       | Bansal 2017   | +                    | +  | +  | +  | +  | +       |
|       | Weston 2017   | +                    | +  | +  | +  | +  | +       |
|       | Bang 2018     | +                    | +  | +  | +  | +  | +       |
|       | Saxena 2018   | -                    | +  | +  | +  | +  | -       |
|       | Lee 2018      | -                    | +  | +  | +  | +  | -       |
|       | Cheng 2019    | +                    | +  | +  | +  | +  | +       |
|       | Di Mitri 2019 | +                    | +  | +  | +  | +  | +       |
|       | Moreira 2020  | +                    | +  | +  | +  | +  | +       |
|       | Tong 2020     | -                    | +  | +  | -  | +  | -       |
|       | Wang 2020     | +                    | +  | +  | +  | +  | +       |
|       | Bang 2020     | +                    | +  | +  | +  | +  | +       |
|       | Takasumi 2021 | +                    | +  | +  | -  | +  | -       |
|       | Ladd 2021     | +                    | +  | -  | +  | +  | -       |
|       | Zhou 2021     | -                    | +  | +  | +  | +  | -       |
|       | Paik 2021     | +                    | +  | +  | +  | +  | +       |

## Domains:

D1: Bias arising from the randomization process.

D2: Bias due to deviations from intended intervention.

D3: Bias due to missing outcome data.

D4: Bias in measurement of the outcome.

D5: Bias in selection of the reported result.

## Judgement

- Some concerns

+ Low

## Supplementary material

Supplementary Figure 1B: Summary plot for the risk of bias assessment for the included studies

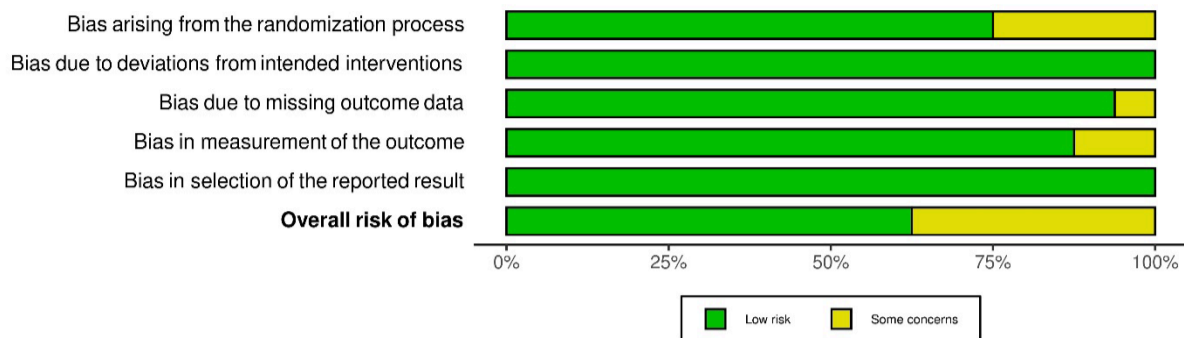

Supplementary table 1: Definition of outcomes used in the included studies

| Authors                     | Adequacy                                                                                      | Cellularity                                                                                                                      | Bloodiness                                                                                                                          |
|-----------------------------|-----------------------------------------------------------------------------------------------|----------------------------------------------------------------------------------------------------------------------------------|-------------------------------------------------------------------------------------------------------------------------------------|
| Attam 2015 <sup>[18]</sup>  | 0 = inadequate aspirate for the cytopathologist to make a diagnosis;<br>1 = adequate aspirate | 0 = no cells;<br>1 = sparsely cellular;<br>2 = moderately cellular; 3 = highly cellular                                          | 0 = free of blood;<br>1 = contaminated with red blood cells;<br>2 = blood clots present                                             |
| Bansal 2017 <sup>[19]</sup> | 0 = inadequate aspirate for the cytopathologist to make a diagnosis;<br>1 = adequate aspirate | 0 = no cells;<br>1 = sparsely cellular;<br>2 = moderately cellular<br>3 = highly cellular                                        | 0 = no blood;<br>1 = contaminated with red blood cells;<br>2 = blood clots present                                                  |
| Weston 2017 <sup>[20]</sup> | Cellularity score < 2 = inadequate;<br>Cellularity score 2 – 3 = adequate                     | 2 = estimated cell count > 500 cells;<br>3 = estimated cell count > 1000 cells                                                   |                                                                                                                                     |
| Bang 2018 <sup>[21]</sup>   | Adequacy defined as FNA sample being of sufficient quality to render a preliminary diagnosis  |                                                                                                                                  | mild < 33%;<br>moderate 33-66%;<br>severe > 66%                                                                                     |
| Lee 2018 <sup>[22]</sup>    | Adequacy defined as FNA sample being of sufficient quality to render a preliminary diagnosis  | fair, <10 cell nests;<br>good, 10 to 20 cell nests;<br>excellent, >20 cell nests                                                 | 3 or fewer blood clots (<25% of the slide)<br>4 – 6 blood clots (25–50% of the slide)<br>7 or more blood clots (> 50% of the slide) |
| Saxena 2018 <sup>[23]</sup> | Adequacy defined as FNA sample being of sufficient quality to render a preliminary diagnosis  |                                                                                                                                  |                                                                                                                                     |
| Cheng 2019 <sup>[24]</sup>  |                                                                                               | 0 (absence or < 10% of cell groups);<br>1+ (10–50% of cell groups);<br>2+ (50–70% of cell groups);<br>3+ (70–90% of cell groups) | 1+ (red blood cells 10–50%);<br>2+ (red blood cells 50–70%);<br>3+ (red blood cells 70–90%)                                         |

## Supplementary material

|                               |                                                                                                                                                                                                                                                                               |                                                                                              |                                                                                                                                                                                                                                                               |
|-------------------------------|-------------------------------------------------------------------------------------------------------------------------------------------------------------------------------------------------------------------------------------------------------------------------------|----------------------------------------------------------------------------------------------|---------------------------------------------------------------------------------------------------------------------------------------------------------------------------------------------------------------------------------------------------------------|
| Di Mitri 2019 <sup>[25]</sup> |                                                                                                                                                                                                                                                                               |                                                                                              | high-moderate contamination ( $\geq 33\%$ : interference with the pathological diagnosis); none-mild contamination ( $\leq 33\%$ : non-interference with the pathological diagnosis)                                                                          |
| Moreira 2020 <sup>[26]</sup>  | Adequacy defined as sample containing adequate cellular material for a conclusive histological diagnosis                                                                                                                                                                      | 0 = no cells;<br>1 = sparsely cellular;<br>2 = moderately cellular<br>3 = highly cellular    | 'none', absent blood cells;<br>'low', a few blood cells without affecting histological diagnosis;<br>'moderate', partially obscured by blood cells but possible histological diagnosis;<br>'high', hidden by blood cells leading to inadequate interpretation |
| Tong 2020 <sup>[27]</sup>     | 0=no valid specimen;<br>1=insufficient tissue to diagnose;<br>2=moderate tissue but still diagnosable;<br>3=sufficient tissue for diagnosis                                                                                                                                   |                                                                                              | 0=no blood contamination;<br>1=slight blood contamination, sparseness of RBCs;<br>2=moderate blood contamination, monolayer of RBCs; 3=significant blood contamination, cell clustering or stratification                                                     |
| Wang 2020 <sup>[28]</sup>     | score 0 = sample with no material;<br>score 1 = samples did not provide histological information;<br>score 2 = limited histological assessment;<br>score 3 = architecturally intact piece of tissue with a length of at least 550 $\mu\text{m}$<br>Score of 2 or 3 = adequate | Score 2 = moderate<br>Score 3 = high                                                         | score 3 = < 25%;<br>score 2 = 25%– 50 %;<br>score 1 = >50%;<br>score 0 = no material                                                                                                                                                                          |
| Bang 2020 <sup>[29]</sup>     |                                                                                                                                                                                                                                                                               | Low<br>Intermediate<br>High                                                                  |                                                                                                                                                                                                                                                               |
| Takasumi 2021 <sup>[30]</sup> | Adequacy defined as FNA sample being of sufficient quality to render a preliminary diagnosis                                                                                                                                                                                  | 0 = no cells;<br>1 = sparsely cellular;<br>2 = moderately cellular;<br>3 = highly cellular   |                                                                                                                                                                                                                                                               |
| Ladd 2021 <sup>[31]</sup>     | Adequacy defined as FNA sample being of sufficient quality to render a preliminary diagnosis                                                                                                                                                                                  | 0—insufficient material for interpretation;<br>1—sufficient material for limited cytological | 1—blood present;<br>2—blood clots present                                                                                                                                                                                                                     |

## Supplementary material

|                           |                                                                                                                                                                                                                                                                                                                                                                                                 |                                                                                                                                                                                                      |  |
|---------------------------|-------------------------------------------------------------------------------------------------------------------------------------------------------------------------------------------------------------------------------------------------------------------------------------------------------------------------------------------------------------------------------------------------|------------------------------------------------------------------------------------------------------------------------------------------------------------------------------------------------------|--|
|                           |                                                                                                                                                                                                                                                                                                                                                                                                 | interpretation, but may not be representative of the entire lesion;<br>2—sufficient material for adequate cytological interpretation                                                                 |  |
| Zhou 2021 <sup>[32]</sup> | Grade A – existing core tissue (defined as an architecturally intact piece of tissue with a long axis measuring at least 550 µm)<br>Grade B – existing core fragments, which does not meet the criteria for architecturally intact histology, but can still yield a diagnosis based on cell morphology;<br>Grade C – no lesion tissue found, and a diagnosis cannot be made based on the sample | Grade A, > 4 clusters, with a minimum of 10 cells in each cluster;<br>Grade B, approximately 2–4 clusters, with a minimum of 10 cells in each cluster;<br>Grade C, < 2 clusters or no cellular smear |  |
| Paik 2021 <sup>[33]</sup> | Poor—no cellular material or inconspicuous whitish core mixed with blood;<br>Fair—presence of whitish core;<br>Good—whitish core with the presence of a wormlike tissue architecture                                                                                                                                                                                                            |                                                                                                                                                                                                      |  |

## Supplementary material

Supplementary Figure 2A: Pair-wise meta-analysis for dry suction vs. no suction based on lesion type

**(A) Adequacy**

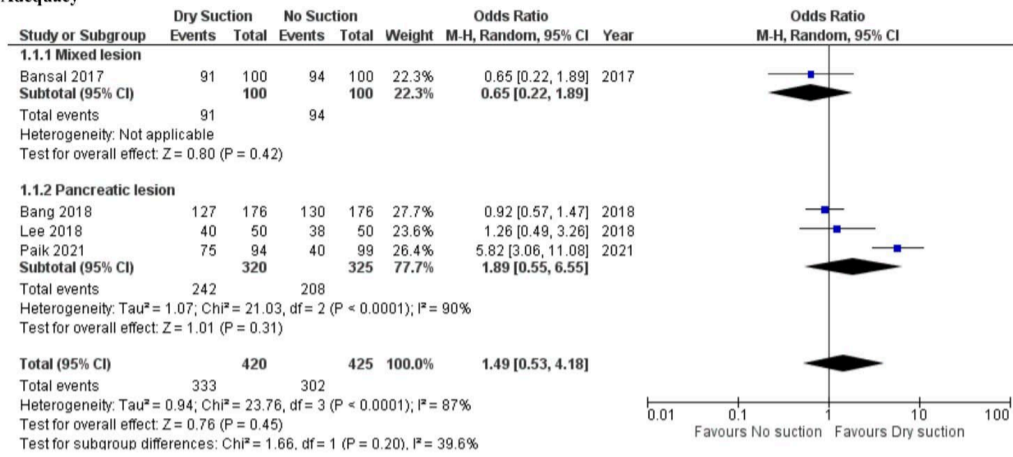

**(B) Bloodiness**

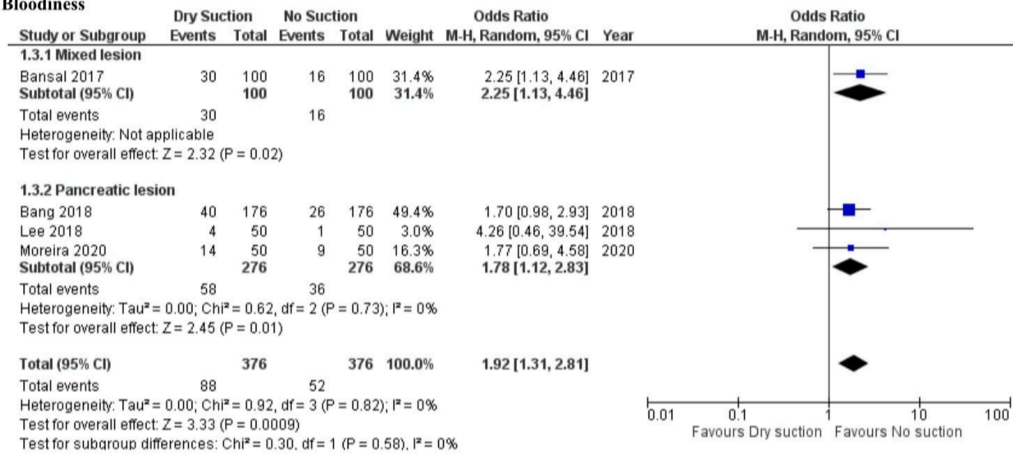

**(C) Cellularity**

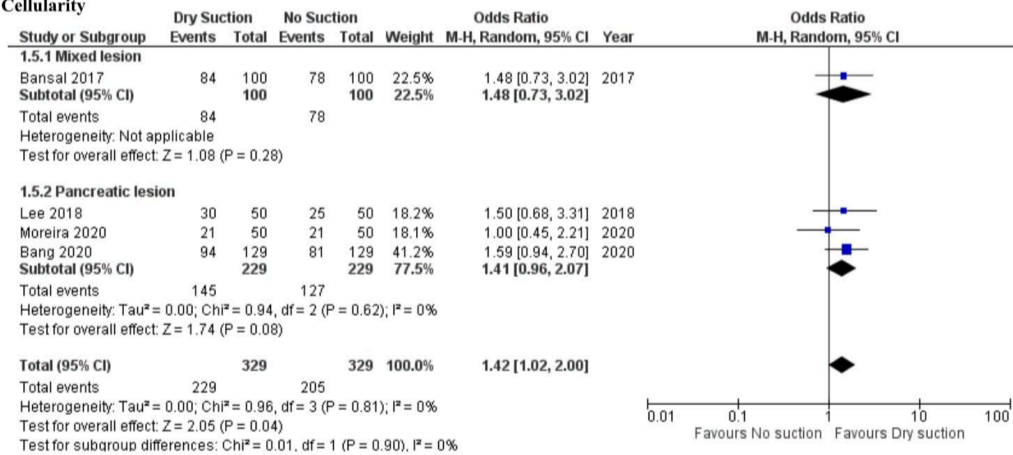

**(D) Accuracy**

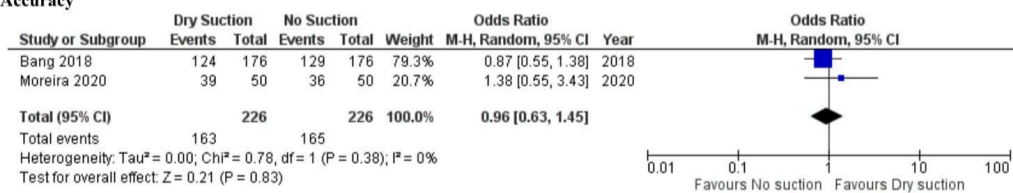

## Supplementary material

Supplementary Figure 2B: Pair-wise meta-analysis for dry suction vs. no suction based on needle type

**(A) Adequacy**

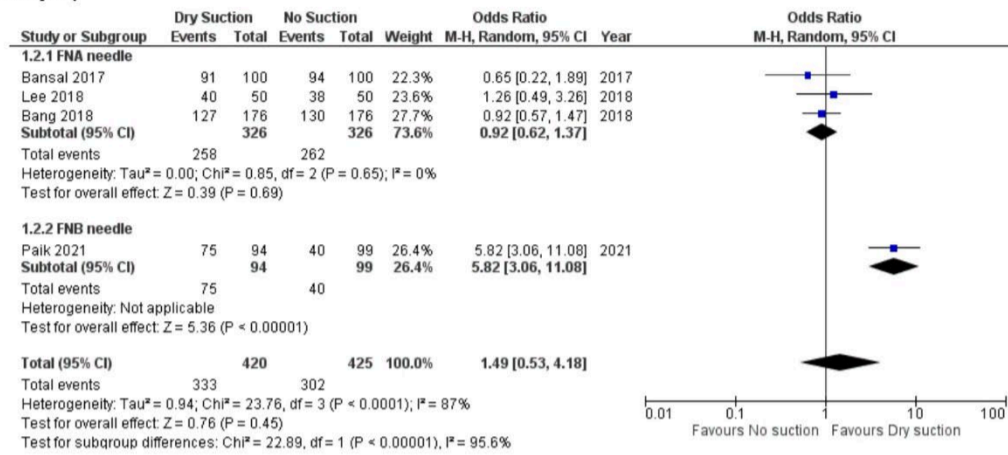

**(B) Bloodiness**

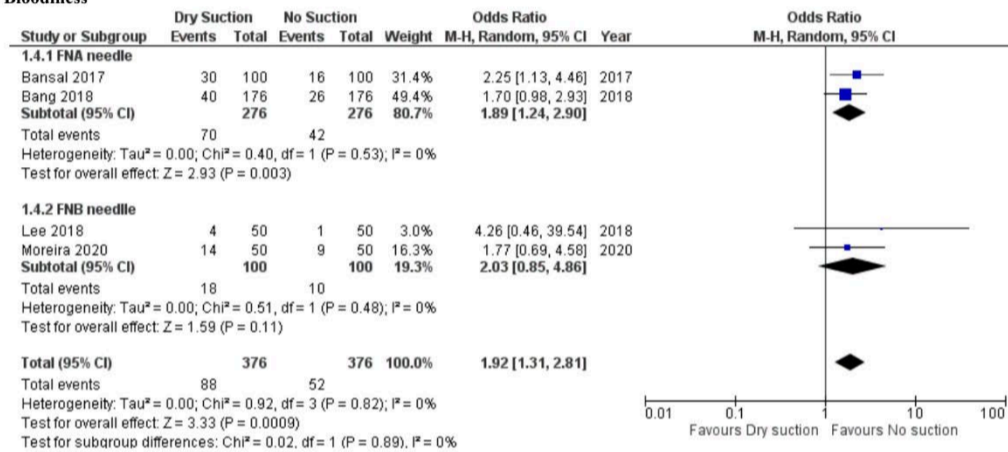

**(C) Cellularity**

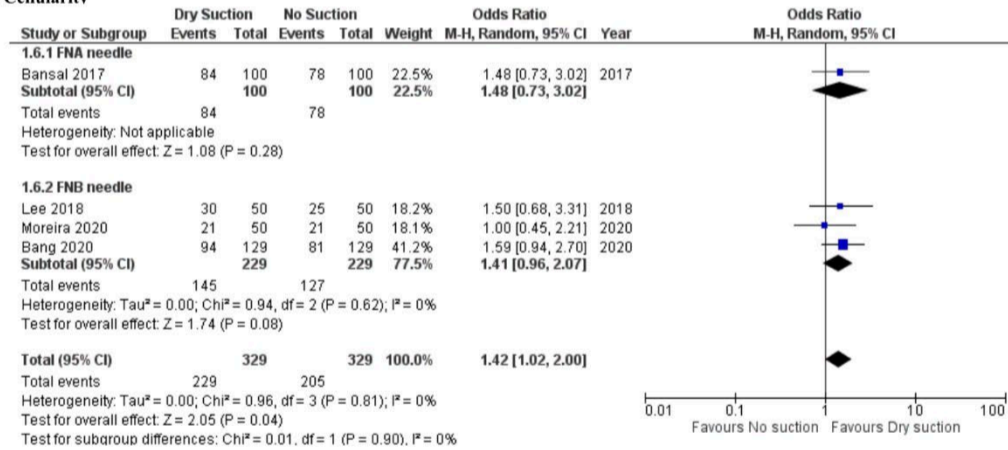

**(D) Accuracy**

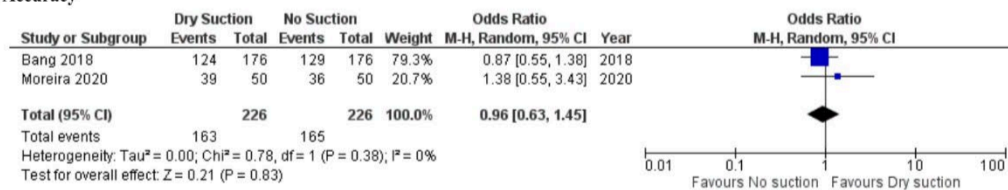

### Supplementary material

Supplementary Figure 3A: Pair-wise meta-analysis for dry suction vs. wet suction based on lesion type

**(A) Adequacy**

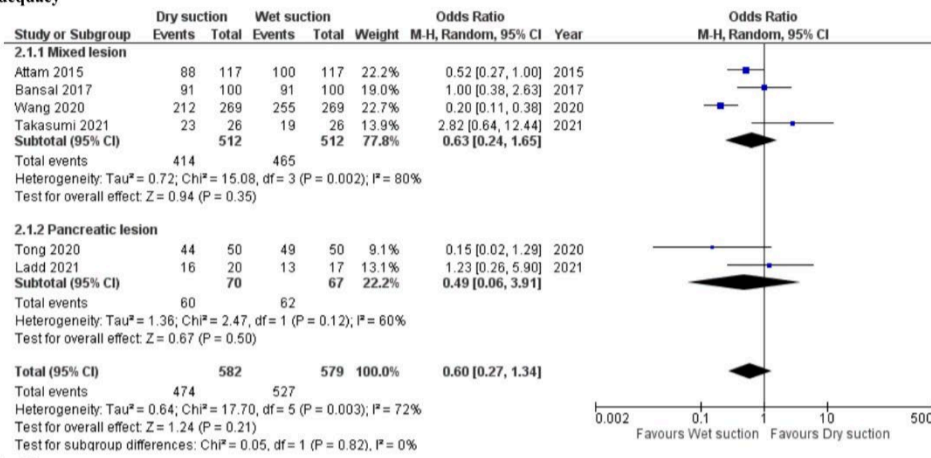

**(B) Bloodiness**

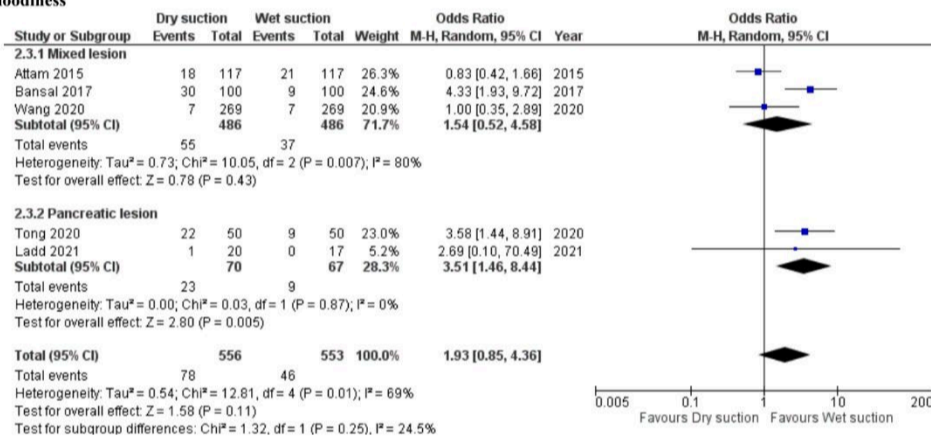

**(C) Cellularity**

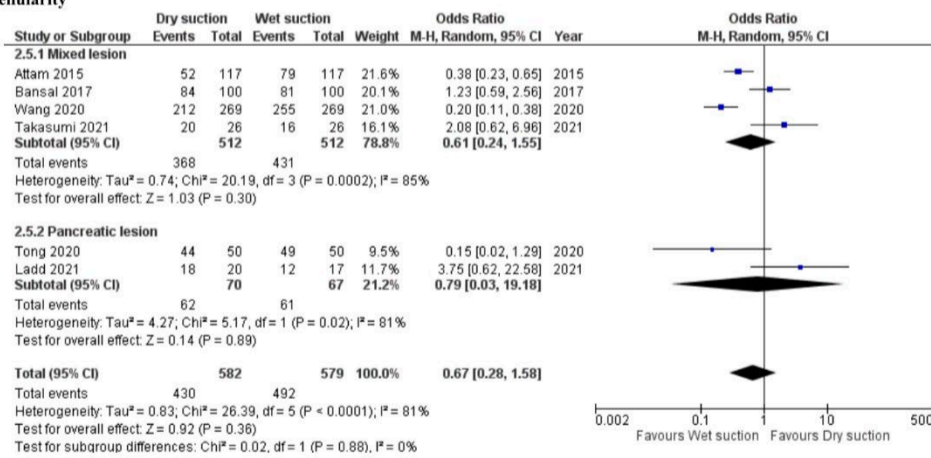

**(D) Accuracy**

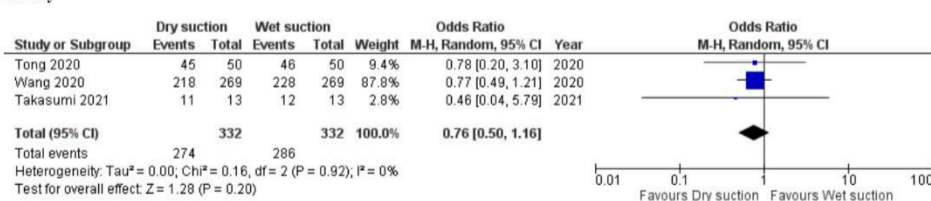

### Supplementary material

Supplementary Figure 3B: Pair-wise meta-analysis for dry suction vs. wet suction based on needle type

**(A) Adequacy**

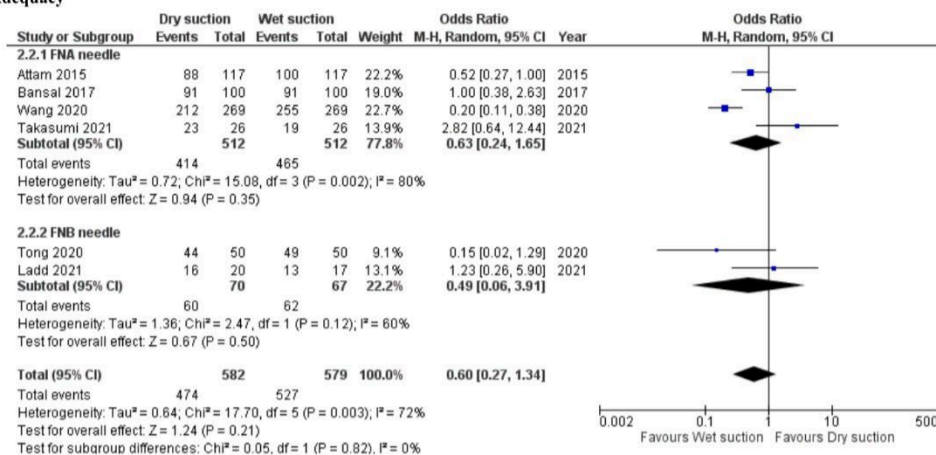

**(B) Bloodiness**

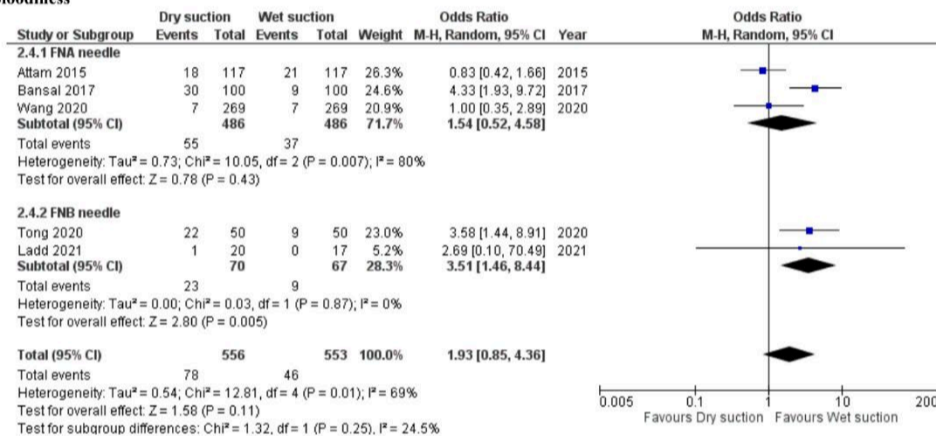

**(C) Cellularity**

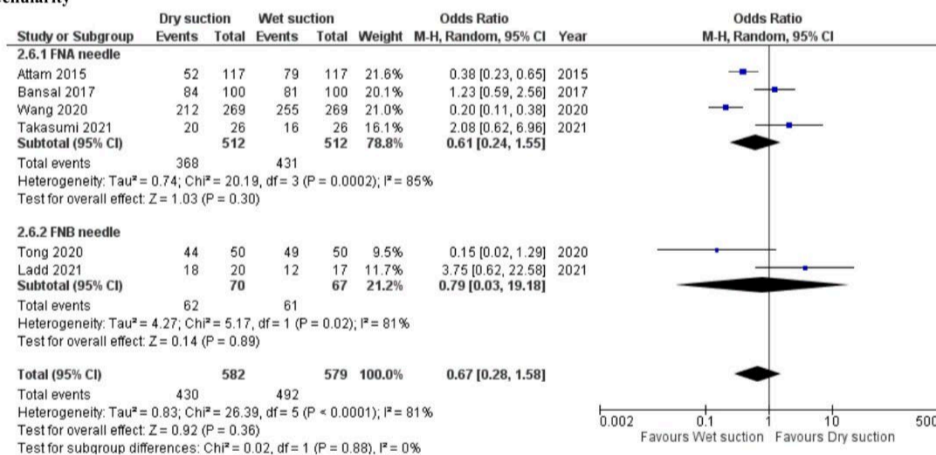

**(D) Accuracy**

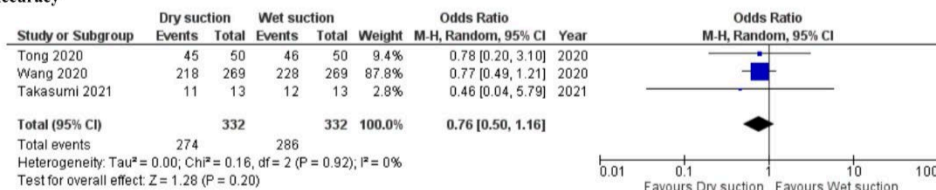



### Supplementary material

Supplementary Figure 4: Pair-wise meta-analysis for dry suction vs. stylet slow pull based on needle type

**(A) Adequacy**

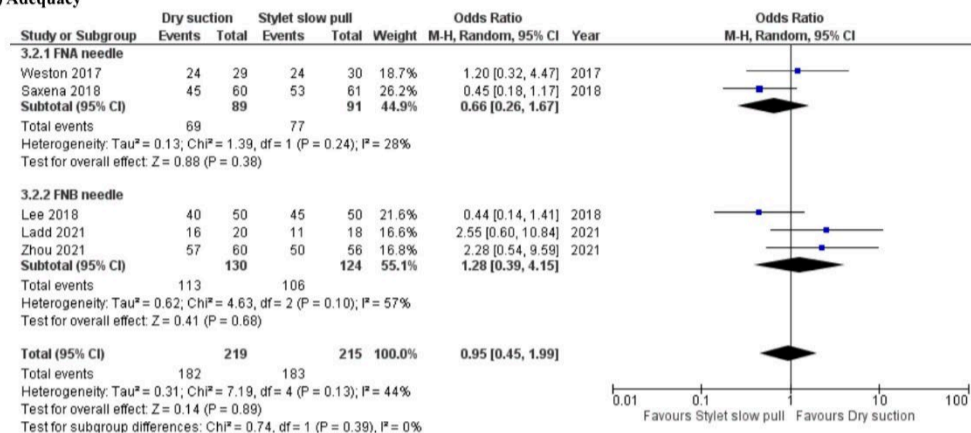

**(B) Bloodiness**

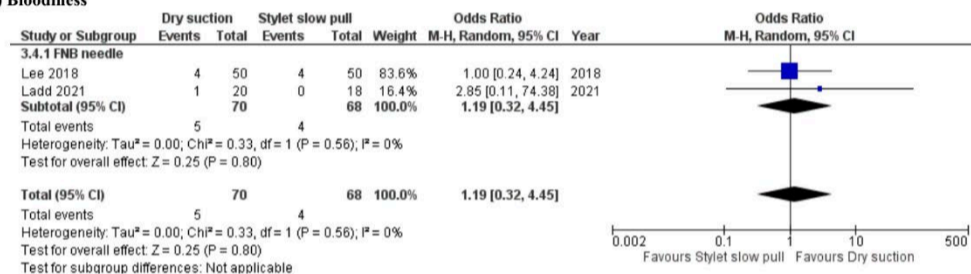

**(C) Cellularity**

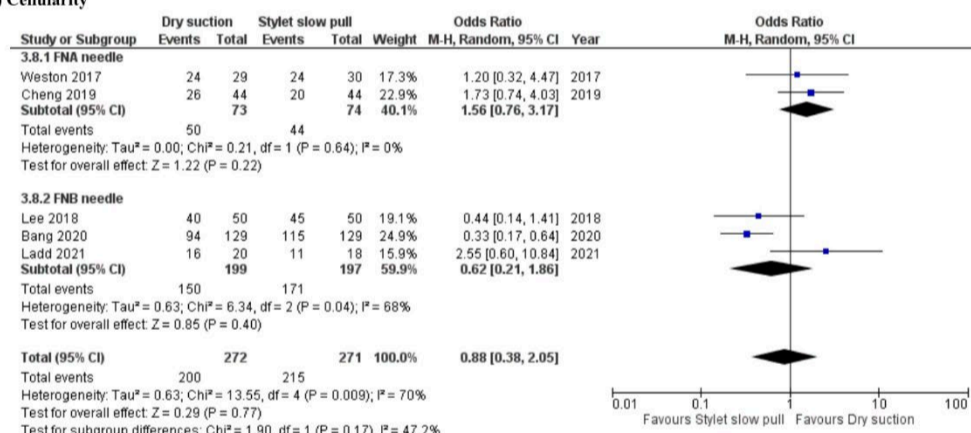

**(D) Accuracy**

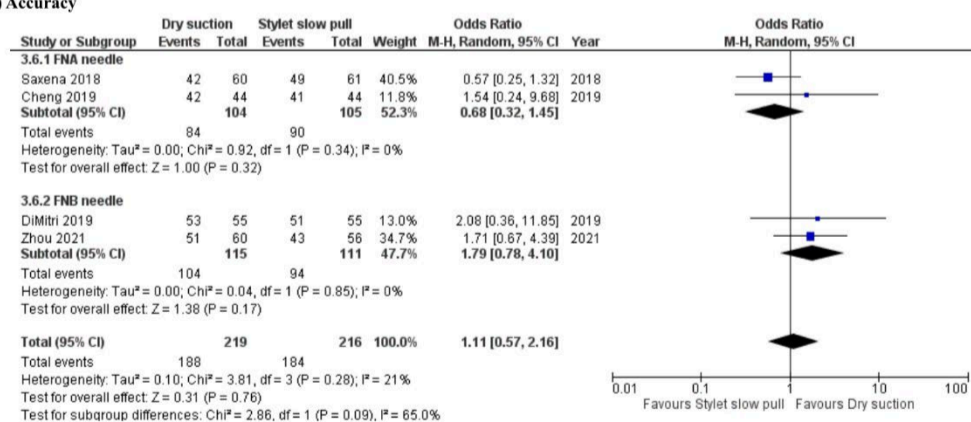

## Supplementary material

Supplementary Figure 5: Network plots for the outcomes (5A) Sample adequacy, (5B) Moderate to high cellularity, (5C) Gross bloodiness, (5D) Diagnostic accuracy

5A: Sample adequacy

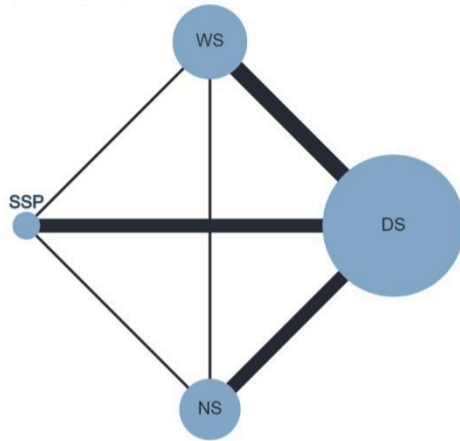

5B: Moderate to high cellularity

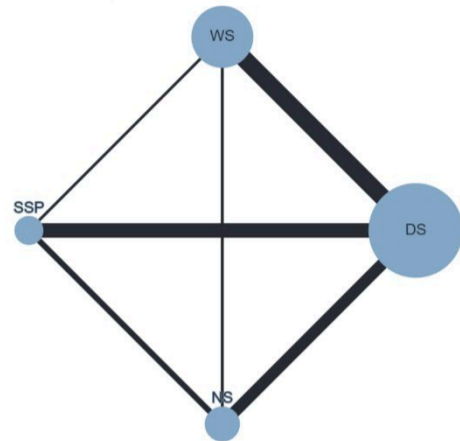

5C: Gross bloodiness

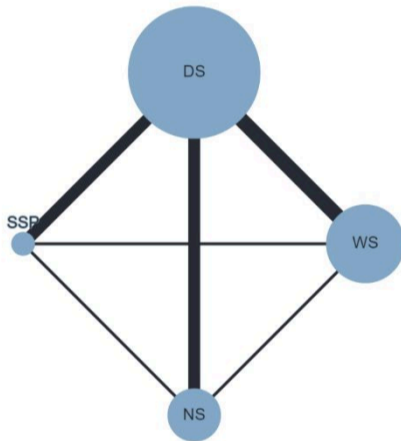

5D: Diagnostic accuracy

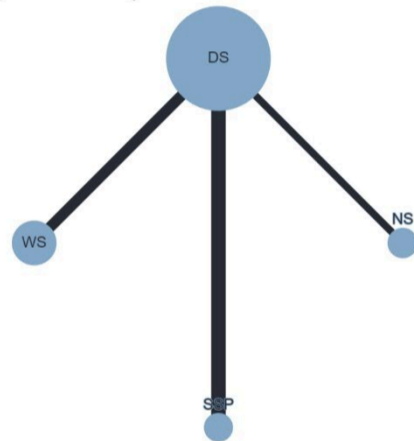

## Supplementary material

Supplementary table 2: League table for the treatment estimates from the Bayesian network meta-analysis for sample adequacy

|                      |                      |                         |                    |
|----------------------|----------------------|-------------------------|--------------------|
| <b>Dry suction</b>   |                      |                         |                    |
| 1.45<br>(0.60, 3.49) | <b>No suction</b>    |                         |                    |
| 0.94<br>(0.36, 2.52) | 0.64<br>(0.19, 2.23) | <b>Stylet slow pull</b> |                    |
| 0.61<br>(0.26, 1.49) | 0.42<br>(0.13, 1.38) | 0.65<br>(0.19, 2.24)    | <b>Wet suction</b> |

Supplementary table 3: League table for the treatment estimates from the Bayesian network meta-analysis for cellularity

|                      |                      |                         |                    |
|----------------------|----------------------|-------------------------|--------------------|
| <b>Dry suction</b>   |                      |                         |                    |
| 1.47<br>(0.63, 3.52) | <b>No suction</b>    |                         |                    |
| 0.67<br>(0.29, 1.60) | 0.46<br>(0.17, 1.31) | <b>Slow stylet pull</b> |                    |
| 0.65<br>(0.31, 1.48) | 0.45<br>(0.16, 1.33) | 0.97<br>(0.33, 2.91)    | <b>Wet suction</b> |

Supplementary table 4: League table for the treatment estimates from the Bayesian network meta-analysis for gross bloodiness

|                                    |                      |                         |                    |
|------------------------------------|----------------------|-------------------------|--------------------|
| <b>Dry suction</b>                 |                      |                         |                    |
| 1.84<br>(0.94, 3.79)               | <b>No suction</b>    |                         |                    |
| 1.00<br>(0.44, 2.25)               | 0.54<br>(0.19, 1.47) | <b>Stylet slow pull</b> |                    |
| <b>2.00</b><br><b>(1.03, 4.14)</b> | 1.02<br>(0.41, 2.44) | 1.88<br>(0.68, 5.34)    | <b>Wet suction</b> |

Supplementary material

Supplementary table 5: League table for the treatment estimates from the Bayesian network meta-analysis for diagnostic accuracy

|                      |                      |                         |                    |
|----------------------|----------------------|-------------------------|--------------------|
| <b>Dry suction</b>   |                      |                         |                    |
| 0.99<br>(0.53, 1.97) | <b>No Suction</b>    |                         |                    |
| 1.08<br>(0.57, 2.20) | 1.10<br>(0.43, 2.89) | <b>Stylet slow pull</b> |                    |
| 0.75<br>(0.37, 1.46) | 0.76<br>(0.28, 1.86) | 0.69<br>(0.25, 1.73)    | <b>Wet suction</b> |

Supplementary Figure 6: Bayesian Forest plot for adequacy

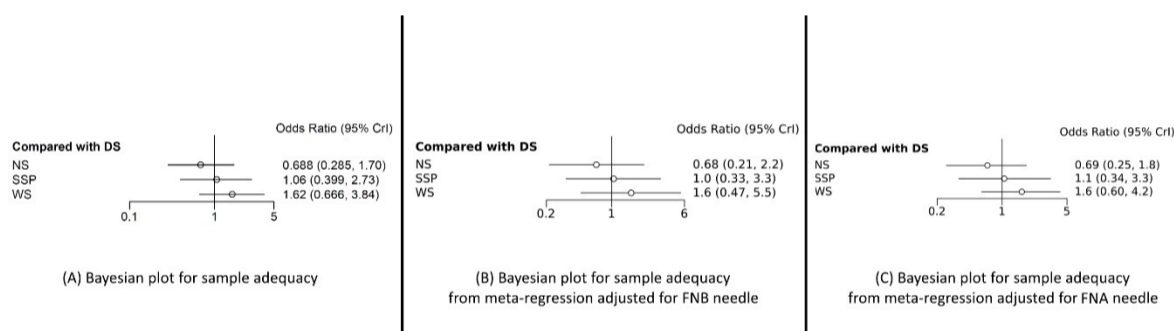

Supplementary Figure 7: Bayesian Forest plot for moderate to high cellularity

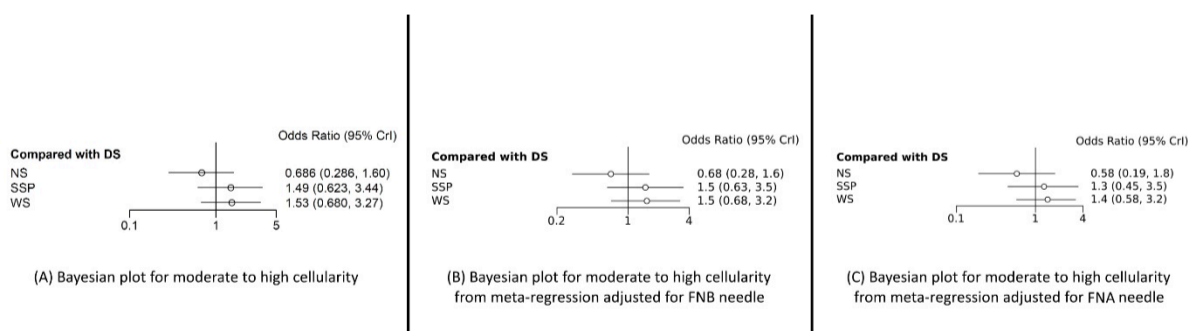

Supplementary material

Supplementary Figure 8: Bayesian Forest plot for diagnostic accuracy

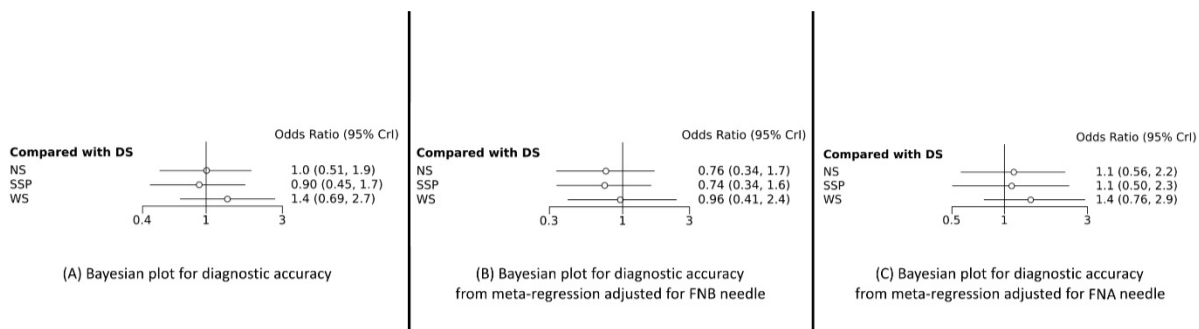

Supplementary Figure 9: Funnel plot for assessment of small study effect for various outcomes (9A) Sample adequacy, (9B) Moderate to high cellularity, (9C) Gross bloodiness, (9D) Diagnostic accuracy

9A: Sample adequacy

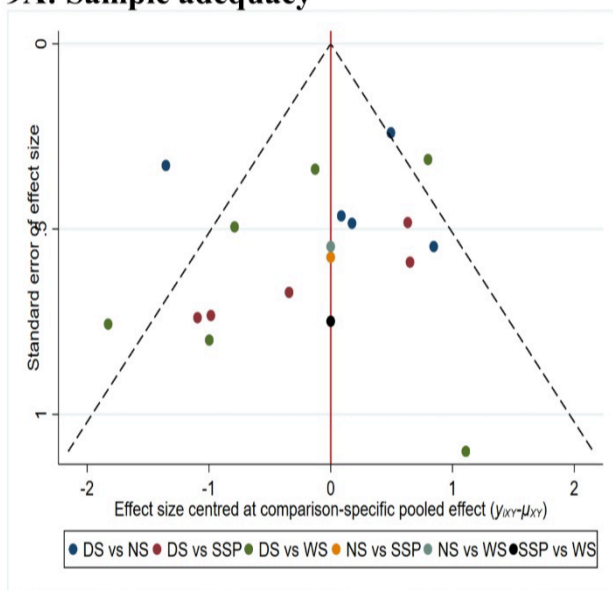

9B: Moderate to high cellularity

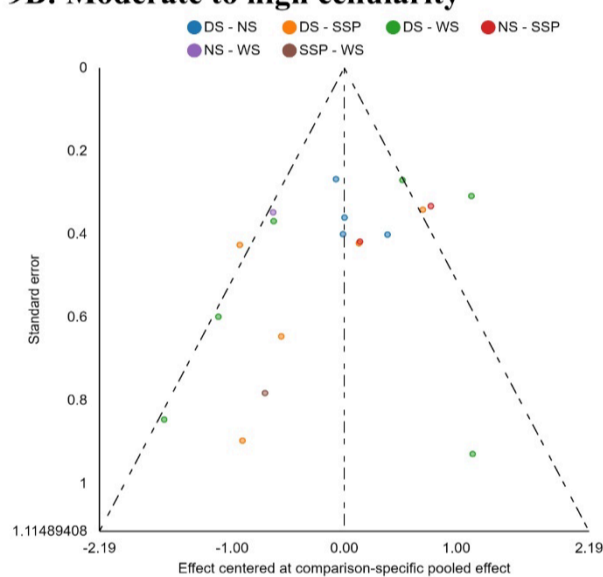

9C: Gross bloodiness

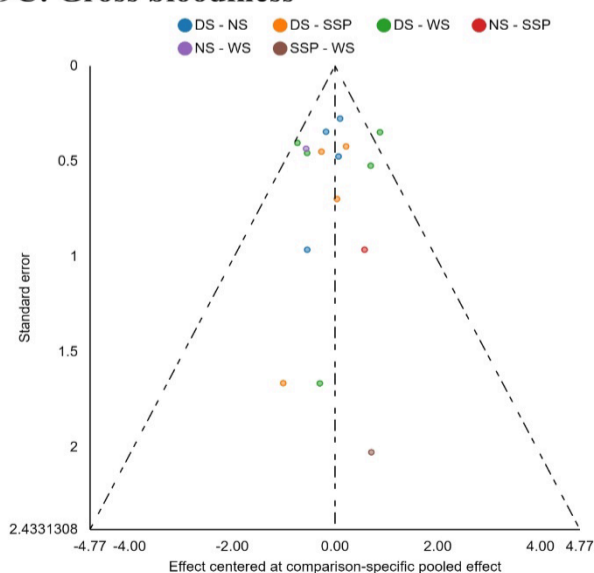

9D: Diagnostic accuracy

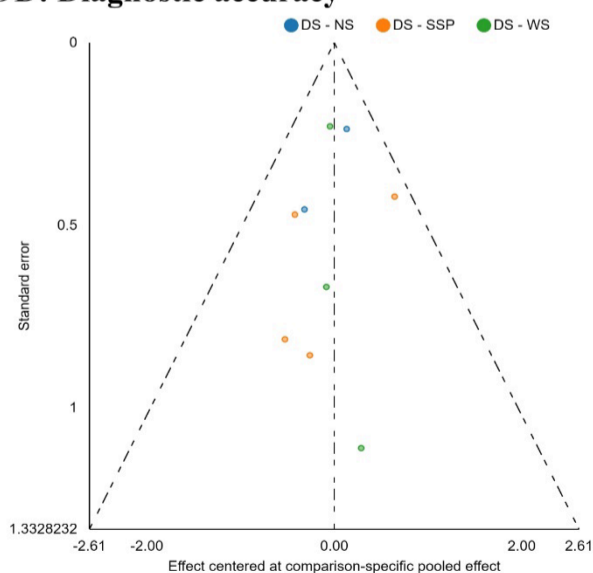

## Supplementary material

Supplementary Table 6: Wald test for estimation of global inconsistency in networks of outcomes

| Outcomes                     | Chi-square with degrees of freedom | P-value |
|------------------------------|------------------------------------|---------|
| Sample adequacy              | chi <sup>2</sup> (6) = 3.48        | 0.747   |
| Moderate to high cellularity | chi <sup>2</sup> (6) = 10.29       | 0.113   |
| Gross bloodiness             | chi <sup>2</sup> (6) = 4.01        | 0.674   |
| Diagnostic accuracy          | chi <sup>2</sup> (0) = 0.00        | -       |

Supplementary Table 7: Summary of findings table with quality of evidence

|                                     | Direct OR           | Confidence            | Indirect OR               | Confidence            | NMA OR                    | Confidence                |
|-------------------------------------|---------------------|-----------------------|---------------------------|-----------------------|---------------------------|---------------------------|
| <b>Sample adequacy</b>              |                     |                       |                           |                       |                           |                           |
| DS – NS                             | 1.48 (0.66 – 3.29)  | Low <sup>¶,§</sup>    | 1.13 (0.07 – 18.91)       | Low <sup>¶,§</sup>    | 1.45 (0.67 – 3.13)        | Low <sup>¶,Δ</sup>        |
| DS – SSP                            | 0.99 (0.40 – 2.44)  | Moderate <sup>¶</sup> | 0.61 (0.03 – 10.71)       | Low <sup>¶,§</sup>    | 0.94 (0.40 – 2.24)        | Low <sup>¶,Δ</sup>        |
| DS – WS                             | 0.60 (0.27 – 1.35)  | Low <sup>¶,§</sup>    | 1.29 (0.07 – 22.50)       | Low <sup>¶,§</sup>    | 0.64 (0.29 – 1.39)        | Low <sup>¶,Δ</sup>        |
| NS – SSP                            | 0.35 (0.05 – 2.48)  | Low <sup>¶,§</sup>    | 0.86 (0.23 – 3.16)        | Low <sup>¶,§</sup>    | 0.65 (0.22 – 1.93)        | Low <sup>¶,Δ</sup>        |
| NS – WS                             | 1.55 (0.23 – 10.57) | Low <sup>¶,§</sup>    | <b>0.26 (0.07 – 0.90)</b> | Low <sup>¶,§</sup>    | 0.44 (0.16 – 1.23)        | Low <sup>¶,Δ</sup>        |
| SSP – WS                            | 0.48 (0.05 – 4.22)  | Low <sup>¶,§</sup>    | 0.76 (0.21 – 7.88)        | Low <sup>¶,§</sup>    | 0.67 (0.22 – 2.03)        | Low <sup>¶,Δ</sup>        |
| <b>Moderate to high cellularity</b> |                     |                       |                           |                       |                           |                           |
| DS – NS                             | 1.38 (0.66 – 2.89)  | Moderate <sup>¶</sup> | 2.10 (0.28 – 15.88)       | Low <sup>¶,§</sup>    | 1.45 (0.73 – 2.90)        | Low <sup>¶,Δ</sup>        |
| DS – SSP                            | 0.82 (0.39 – 1.73)  | Low <sup>¶,§</sup>    | 0.11 (0.01 – 1.02)        | Low <sup>¶,§</sup>    | 0.67 (0.33 – 1.72)        | Low <sup>¶,Δ</sup>        |
| DS – WS                             | 0.64 (0.32 – 1.26)  | Low <sup>¶,§</sup>    | 1.14 (0.11 – 11.36)       | Low <sup>¶,§</sup>    | 0.67 (0.35 – 1.29)        | Low <sup>¶,Δ</sup>        |
| NS – SSP                            | 0.28 (0.10 – 0.80)  | Low <sup>¶,§</sup>    | 1.13 (0.28 – 4.57)        | Low <sup>¶,§</sup>    | 0.46 (0.20 – 1.07)        | Low <sup>¶,Δ</sup>        |
| NS – WS                             | 0.83 (0.19 – 3.60)  | Low <sup>¶,§</sup>    | 0.33 (0.11 – 0.98)        | Low <sup>¶,§</sup>    | 0.46 (0.19 – 1.03)        | Low <sup>¶,Δ</sup>        |
| SSP – WS                            | 2.08 (0.26 – 16.56) | Low <sup>¶,§</sup>    | 0.84 (0.30 – 2.30)        | Low <sup>¶,§</sup>    | 1.00 (0.40 – 2.47)        | Low <sup>¶,Δ</sup>        |
| <b>Gross bloodiness</b>             |                     |                       |                           |                       |                           |                           |
| DS – NS                             | 1.97 (1.15 – 3.38)  | Moderate <sup>¶</sup> | 0.26 (0.02 – 2.90)        | Low <sup>¶,§</sup>    | <b>1.79 (1.06 – 3.03)</b> | Low <sup>¶,§</sup>        |
| DS – SSP                            | 1.09 (0.55 – 2.13)  | Moderate <sup>¶</sup> | 0.19 (0.00 – 12.98)       | Low <sup>¶,§</sup>    | 1.04 (0.53 – 2.03)        | Low <sup>¶,Δ</sup>        |
| DS – WS                             | 1.88 (1.11 – 3.20)  | Low <sup>¶,§</sup>    | 2.12 (0.12 – 37.52)       | Low <sup>¶,§</sup>    | <b>1.89 (1.12 – 3.18)</b> | Low <sup>¶,§</sup>        |
| NS – SSP                            | 0.23 (0.02 – 2.39)  | Low <sup>¶,§</sup>    | 0.66 (0.27 – 1.62)        | Moderate <sup>¶</sup> | 0.58 (0.25 – 1.34)        | Low <sup>¶,Δ</sup>        |
| NS – WS                             | 1.93 (0.65 – 5.70)  | Low <sup>¶,§</sup>    | 0.70 (0.29 – 1.71)        | Low <sup>¶,§</sup>    | 1.05 (0.53 – 2.10)        | Low <sup>¶,Δ</sup>        |
| SSP – WS                            | 0.95 (0.02 – 53.06) | Low <sup>¶,§</sup>    | 1.87 (0.79 – 4.41)        | Low <sup>¶,§</sup>    | 1.81 (0.78 – 4.20)        | Low <sup>¶,Δ</sup>        |
| <b>Diagnostic accuracy</b>          |                     |                       |                           |                       |                           |                           |
| DS – NS                             | 0.96 (0.63 – 1.45)  | Moderate <sup>¶</sup> | -                         | -                     | 0.96 (0.63 – 1.45)        | Very low <sup>¶,Δ,¥</sup> |
| DS – SSP                            | 1.06 (0.60 – 1.85)  | Moderate <sup>¶</sup> | -                         | -                     | 1.06 (0.60 – 1.85)        | Very low <sup>¶,Δ,¥</sup> |
| DS – WS                             | 0.76 (0.50 – 1.16)  | Moderate <sup>¶</sup> | -                         | -                     | 0.76 (0.50 – 1.16)        | Very low <sup>¶,Δ,¥</sup> |
| NS – SSP                            | -                   | -                     | 1.11 (0.55 – 2.22)        | Moderate <sup>¶</sup> | 1.11 (0.55 – 2.22)        | Very low <sup>¶,Δ,¥</sup> |
| NS – WS                             | -                   | -                     | 0.79 (0.44 – 1.43)        | Moderate <sup>¶</sup> | 0.79 (0.44 – 1.43)        | Very low <sup>¶,Δ,¥</sup> |
| SSP – WS                            | -                   | -                     | 0.72 (0.35 – 1.45)        | Moderate <sup>¶</sup> | 0.72 (0.35 – 1.45)        | Very low <sup>¶,Δ,¥</sup> |

¶ risk of bias; Δ Imprecision; § Heterogeneity; ¥ Incoherence
